# Supplementary material for: Integrative web-based analysis of omics data for study of drugs against SARS-CoV-2
Source: PubMed Central journal article supplement (PMC8144609; doi:10.1038/s41598-021-89578-6), 2021-05-24

# **Integrative Web-based Analysis of Omics Data for Study of Drugs Against SARS-CoV-2**

ZhiGang Wang<sup>1</sup>, YongQun He<sup>2</sup>, Jing Huang<sup>3</sup>, XiaoLin Yang<sup>1\*</sup>

<sup>1</sup> Department of Biomedical Engineering, Institute of Basic Medical Sciences Chinese Academy of Medical Sciences, School of Basic Medicine Peking Union Medical College, Beijing, 100005, China.

<sup>2</sup> Unit for Laboratory Animal Medicine, Department of Microbiology and Immunology, Center for Computational Medicine and Bioinformatics, University of Michigan Medical School, Ann Arbor, MI 48105, USA.

<sup>3</sup> Department of Respiratory and Critical Care Medicine, Chongqing General Hospital, University of Chinese Academy of Sciences, Chongqing, 400014, China

\* Correspondence should be addressed to X.Y. (email: yangxl@pumc.edu.cn)

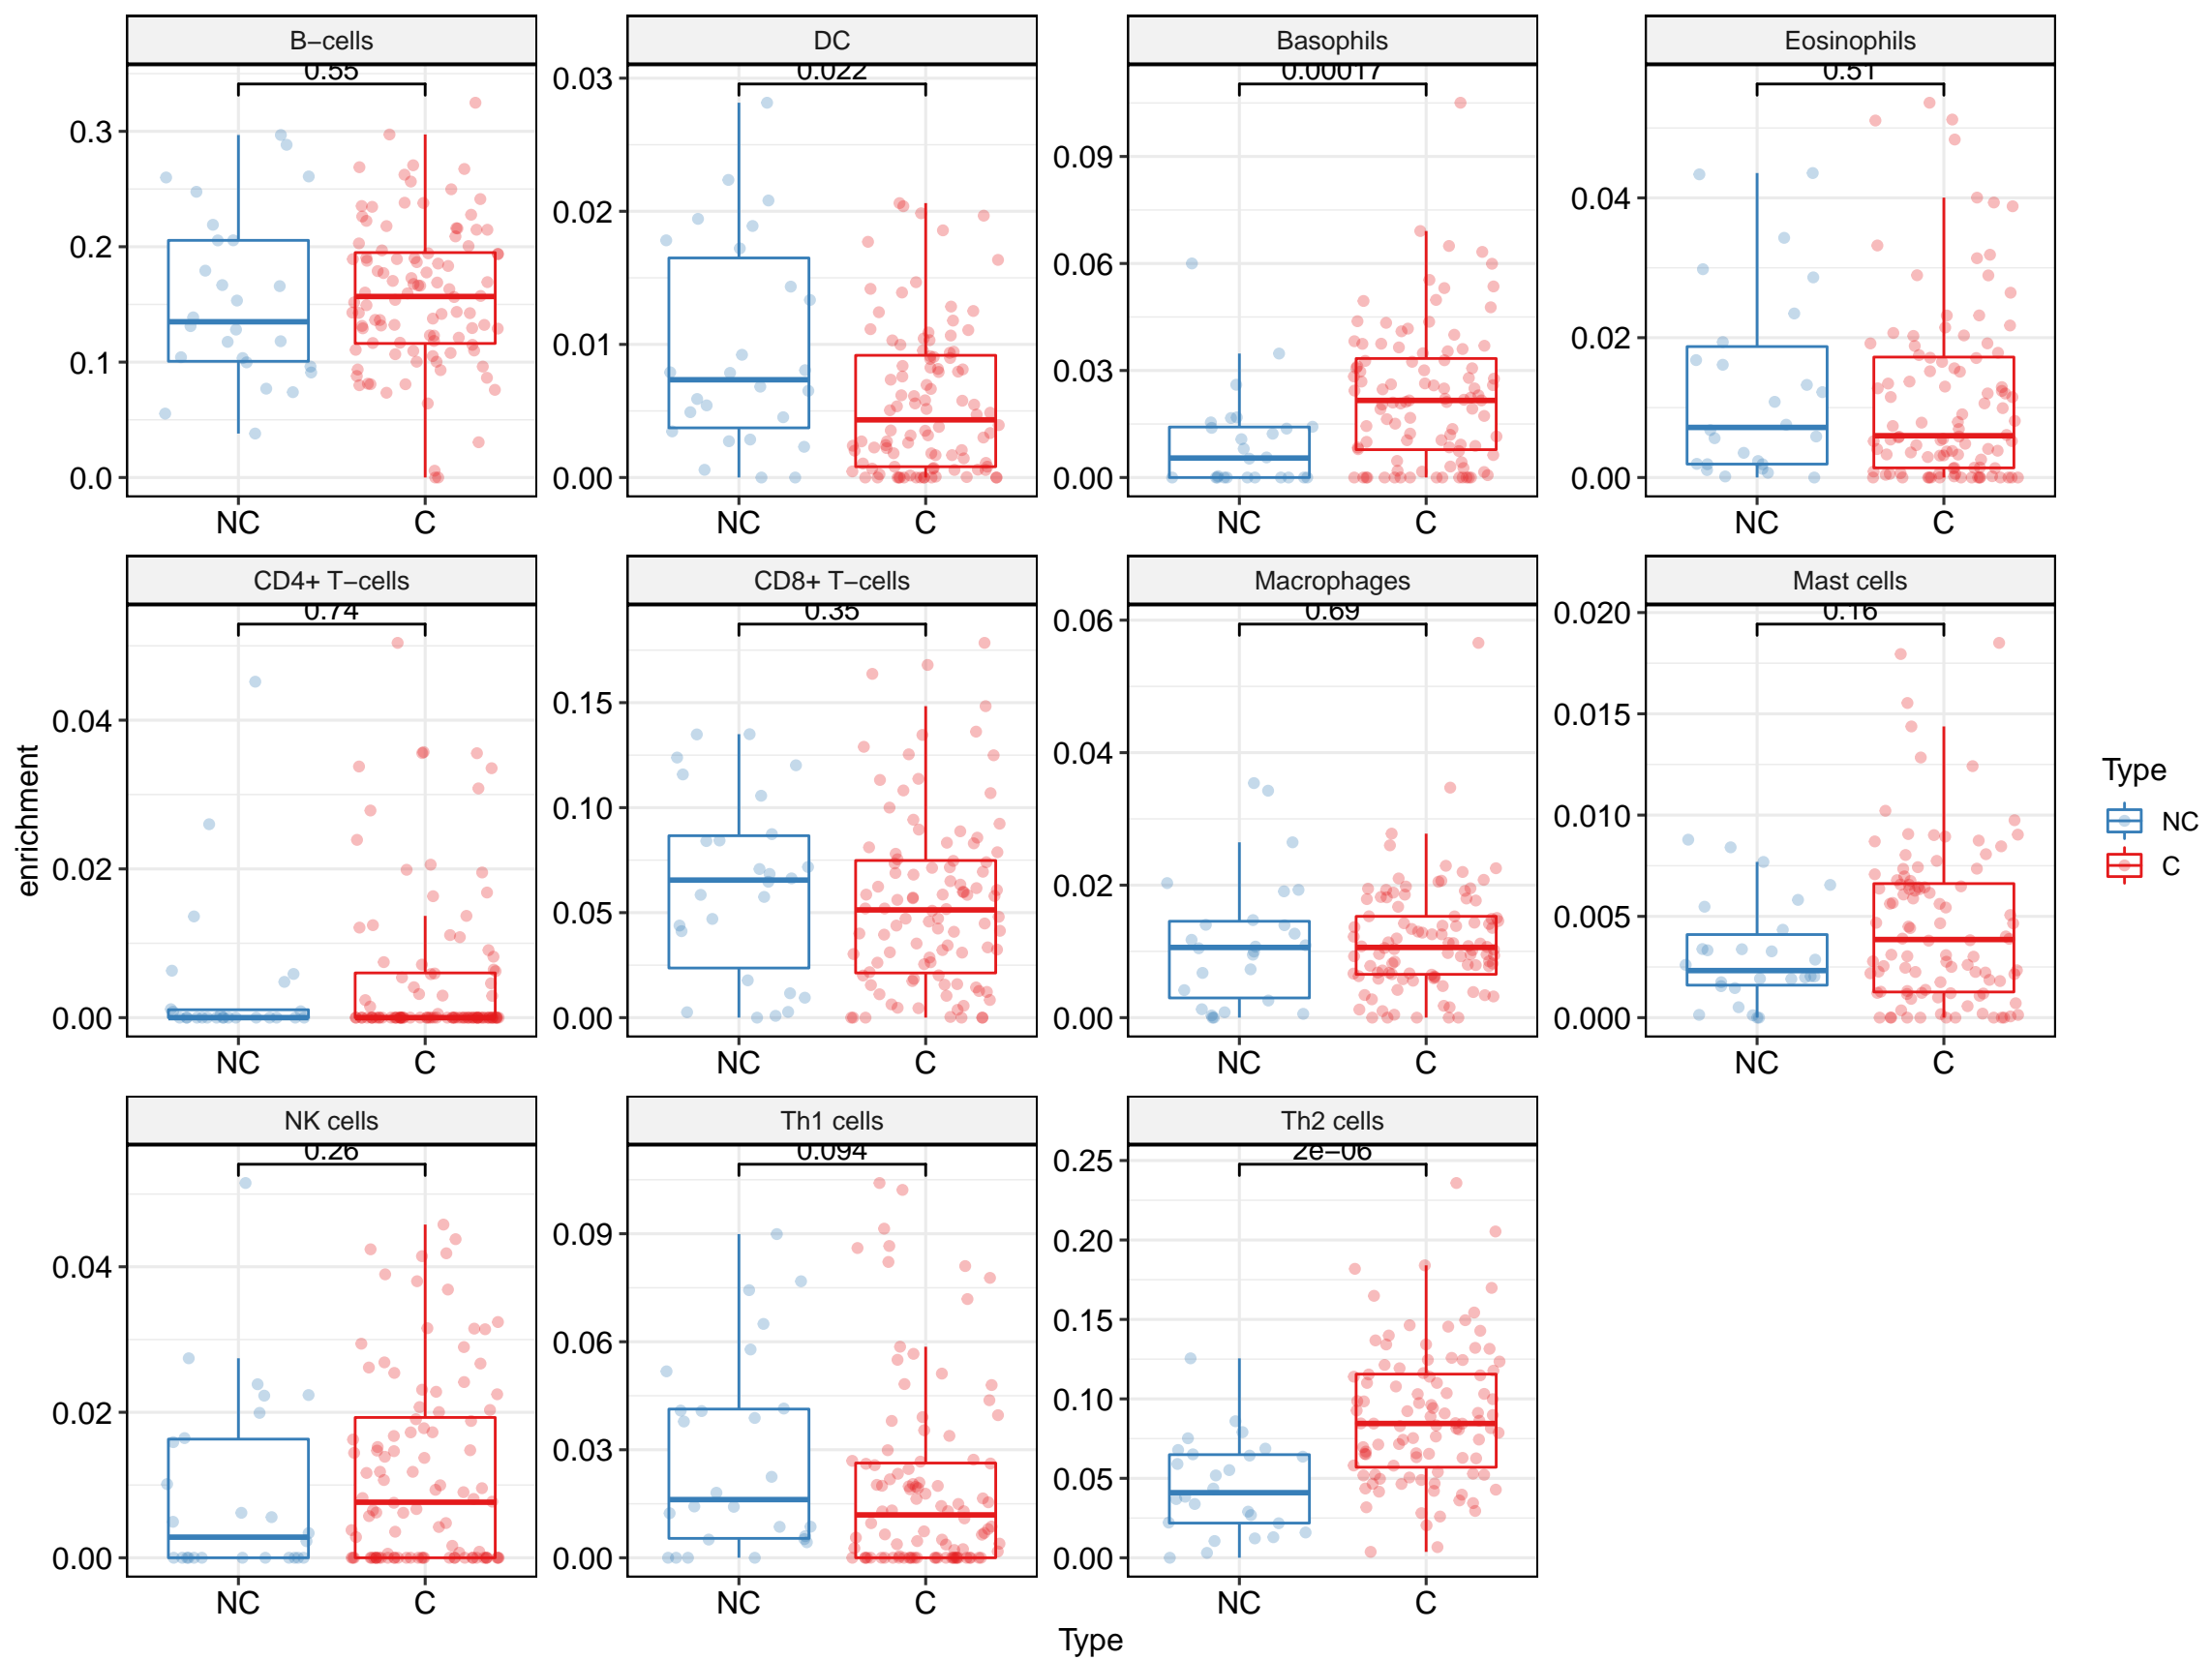

Supplement: 41598_2021_89578_MOESM3_ESM.pdf [file 41598_2021_89578_MOESM3_ESM.pdf]
