# Supplementary material for: Integrative web-based analysis of omics data for study of drugs against SARS-CoV-2
Source: PubMed Central journal article supplement (PMC8144609; doi:10.1038/s41598-021-89578-6), 2021-05-24

A

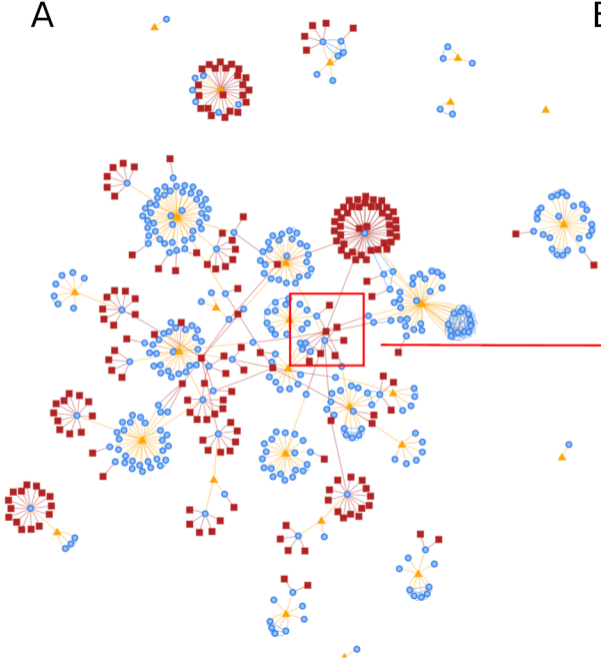

B

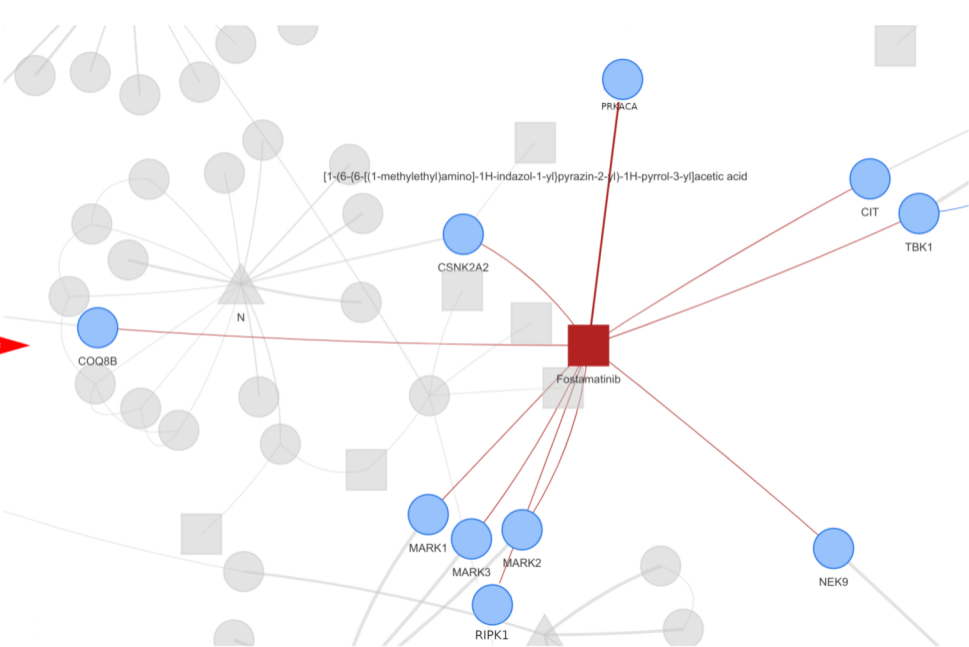

Supplement: 41598_2021_89578_MOESM5_ESM.pdf [file 41598_2021_89578_MOESM5_ESM.pdf]
